# Supplementary material for: K0.38(H2O)0.82MoS2 as a universal host for rechargeable aqueous cation (K+, Na+, Li+, NH4+, Mg2+, Al3+) batteries
Source: Royal Society of Chemistry journal article supplement (doi:10.1039/d0dt00471e), 2020-01-01
Supplement: d0dt00471e1.pdf [file d0dt00471e1.pdf]

## Supporting Information

**$K_{0.38}(H_2O)_{0.82}MoS_2$  as a universal host for rechargeable aqueous cation**

**$(K^+, Na^+, Li^+, NH_4^+, Mg^{2+}, Al^{3+})$  batteries**

Miao Xie,<sup>ab</sup> Wei Zhao,<sup>\*a</sup> Yuanlv Mao,<sup>ab</sup> and Fuqiang Huang<sup>\*ac</sup>

<sup>a</sup> State Key Laboratory of High Performance Ceramics and Superfine Microstructure, Shanghai Institute of Ceramics, Chinese Academy of Sciences, Shanghai 200050, P. R. China. E-mail:zhaowei220@mail.sic.ac.cn; huangfq@mail.sic.ac.cn

<sup>b</sup> Center of Materials Science and Optoelectronics Engineering, University of Chinese Academy of Sciences, Beijing 100049, China

<sup>c</sup> State Key Laboratory of Rare Earth Materials Chemistry and Applications, College of Chemistry and Molecular Engineering, Peking University, Beijing 100871, P. R. China

## 1. Supplementary figures

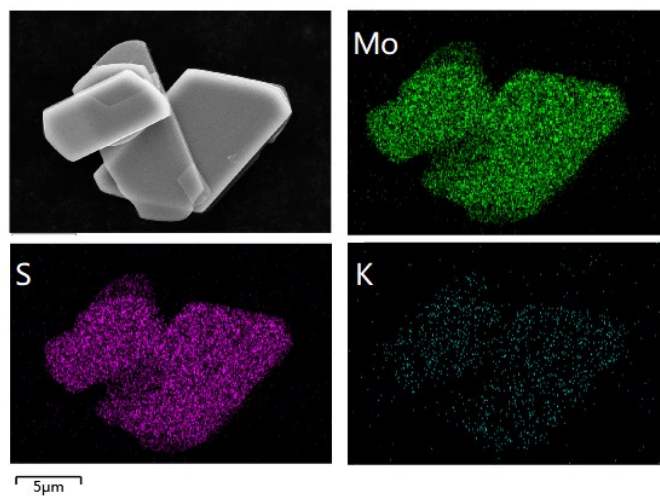

**Fig. S1** SEM image and elemental mapping of  $\text{K}_{0.38}(\text{H}_2\text{O})_{0.82}\text{MoS}_2$ .

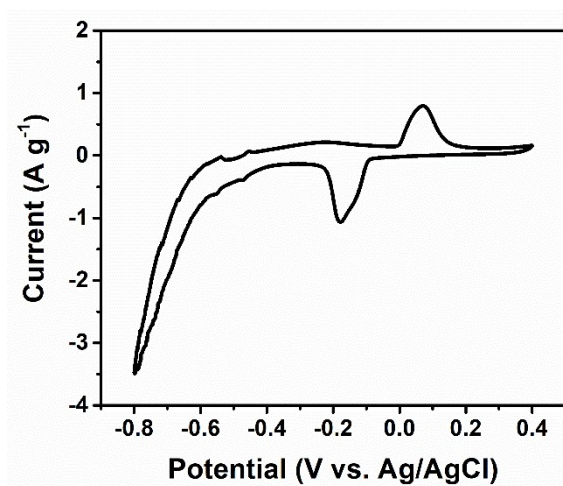

**Fig. S2** Cyclic voltammetry curves of KMS electrode for  $\text{Al}^{3+}$  electrolyte at the scan rate of  $1 \text{ mV s}^{-1}$  based on the voltage range of  $-0.8\text{-}0.4 \text{ V vs. Ag/AgCl}$ .

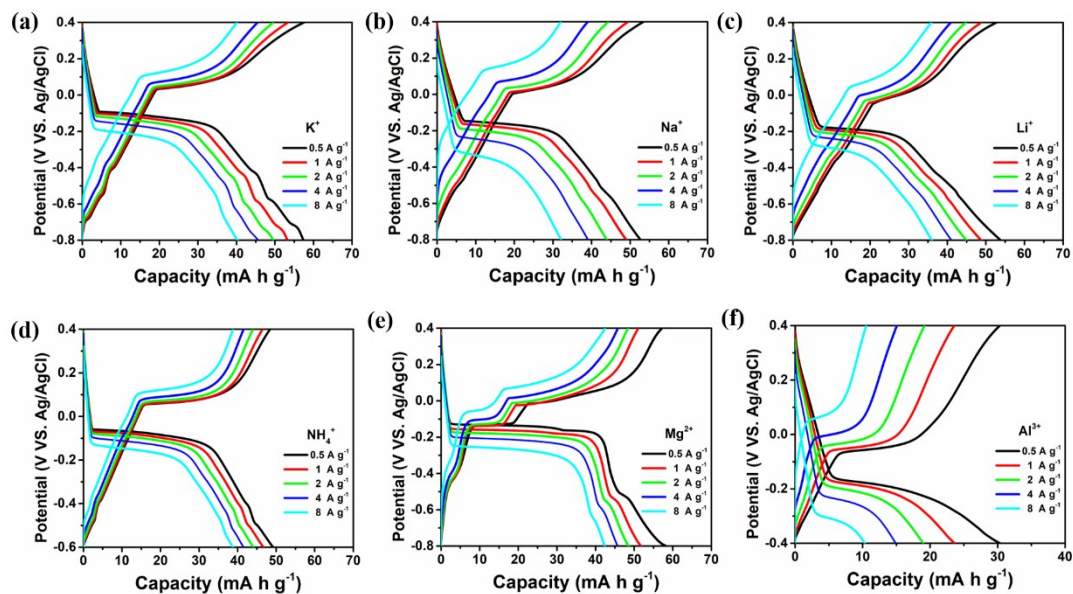

**Fig. S3** Galvanostatic discharge-charge profiles of KMS electrode at the current densities of 0.5A g<sup>-1</sup>, 1 A g<sup>-1</sup>, 2 A g<sup>-1</sup>, 4 A g<sup>-1</sup>, 8 A g<sup>-1</sup> in 0.5 M sulfate solutions: (a) K<sub>2</sub>SO<sub>4</sub>, (b) Na<sub>2</sub>SO<sub>4</sub>, (c) Li<sub>2</sub>SO<sub>4</sub>, (d) (NH<sub>4</sub>)<sub>2</sub>SO<sub>4</sub>, (e) MgSO<sub>4</sub>, (f) (Al)<sub>2</sub>(SO<sub>4</sub>)<sub>3</sub>.

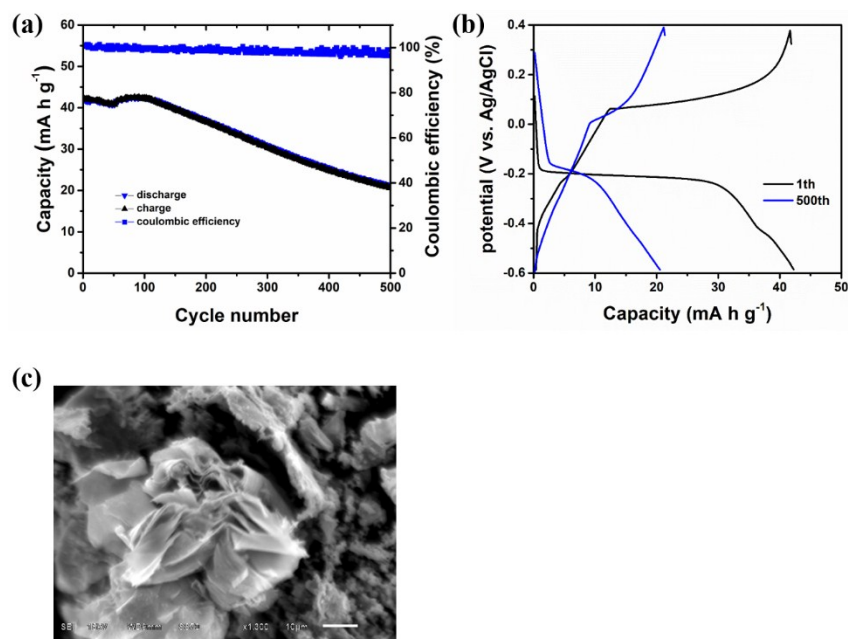

**Fig. S4** (a) The cycling stability of KMS electrode in 0.5 M K<sub>2</sub>SO<sub>4</sub> aqueous solution at the current density of 5 A g<sup>-1</sup>, (b) Galvanostatic discharge-charge profiles of KMS at the 1th and 500th cycles, (c) SEM image of KMS electrode after 500 cycles.

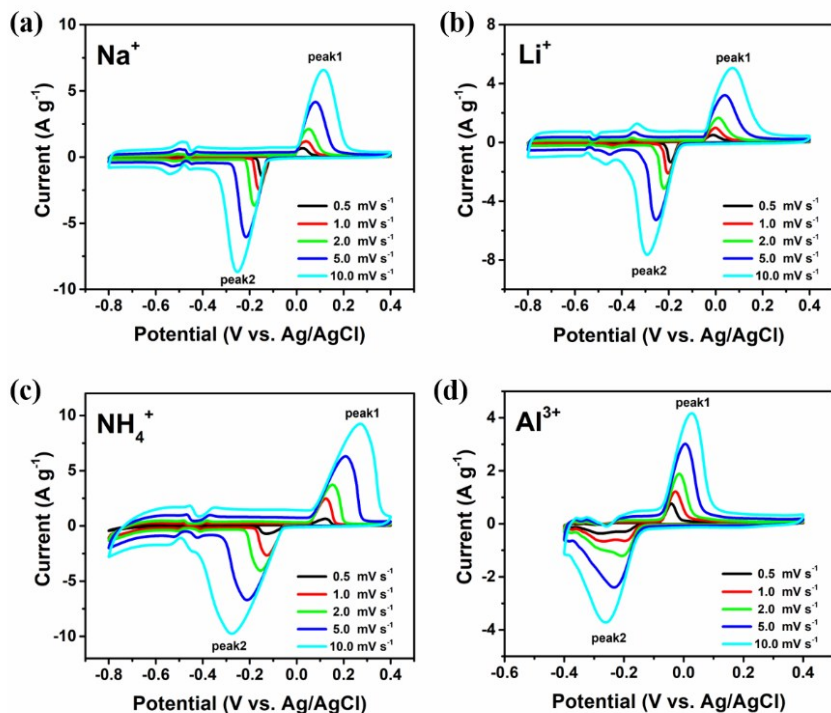

**Fig. S5** Sweep voltammetry of KMS electrode at varies scan rates for (a) Li<sup>+</sup>, (b) Na<sup>+</sup>, (c) NH<sub>4</sub><sup>+</sup>, (d) Al<sup>3+</sup> aqueous electrolytes.

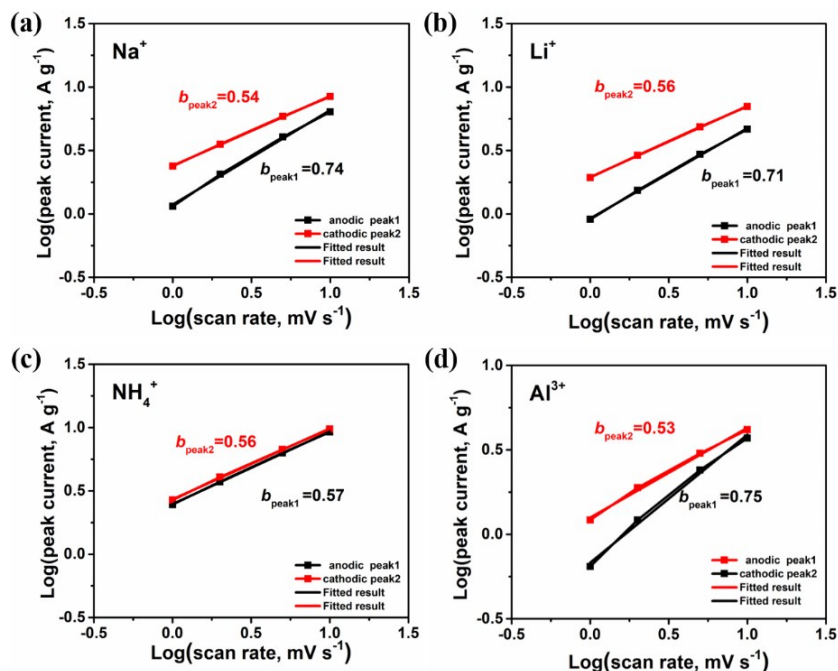

**Fig. S6** Relationship between the peak currents and corresponding scan rates for KMS electrode in (a) Li<sup>+</sup>, (b) Na<sup>+</sup>, (c) NH<sub>4</sub><sup>+</sup>, (d) Al<sup>3+</sup> aqueous electrolytes.

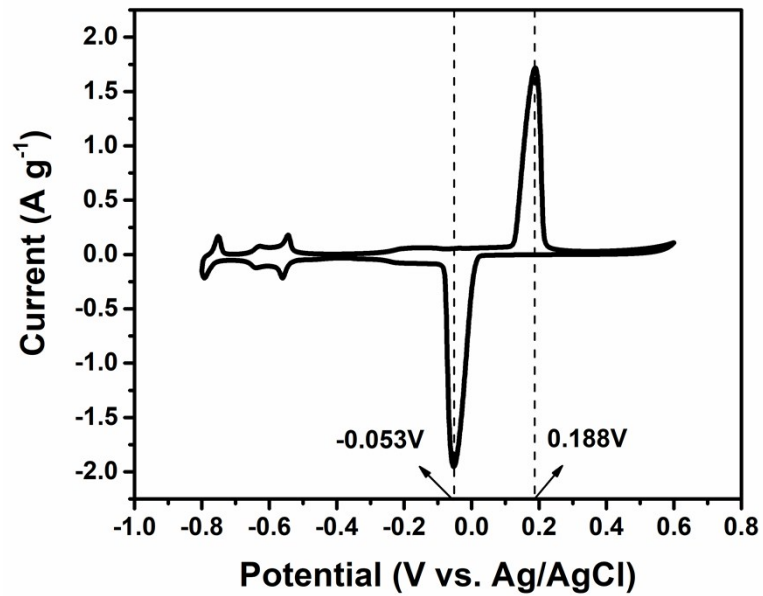

Fig. S7 Cyclic voltammetry curves of KMS electrode at  $0.5 \text{ mV s}^{-1}$  in  $1 \text{ M CsCl}$ .

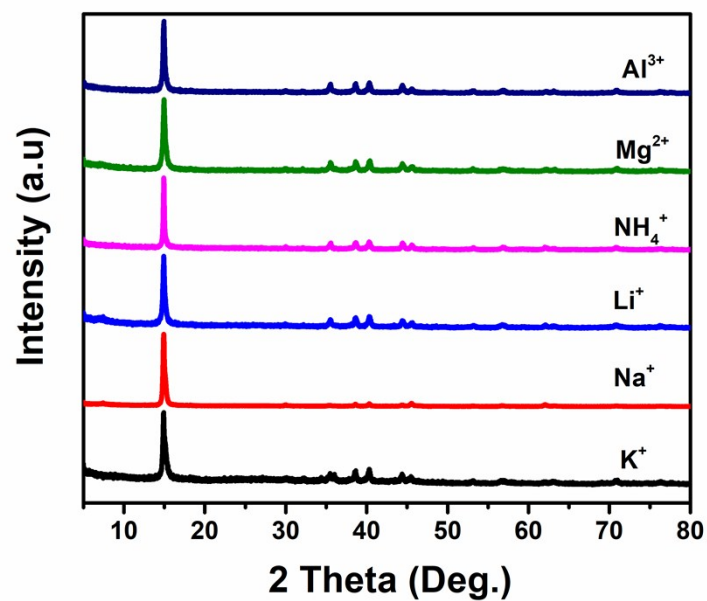

Fig. S8 XRD patterns of the charged state for KMS electrode in different aqueous electrolytes.

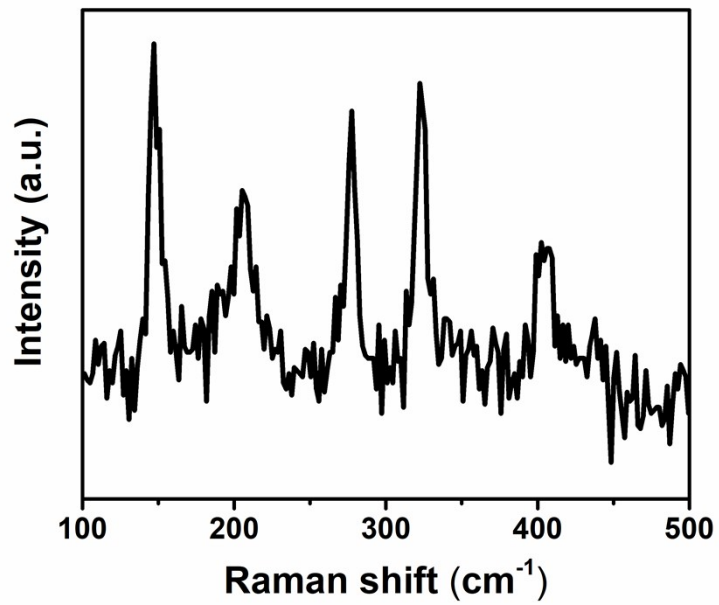

Fig. S9 Raman spectrum of charged state for KMS electrode

## 2. Supplementary tables

**Table. S1** Initial discharge capacity and the second charge capacity of different interaction cations at 0.5 A g<sup>-1</sup> along with calculated capacity fade rate.

| <i>Cation inserted</i>            | <i>discharge capacity(mA h g<sup>-1</sup>)</i> | <i>charge capacity( mA h g<sup>-1</sup>)</i> | <i>Coulombic efficiency (%)</i> | <i>Capacity fade(%/cycle)</i> |
|-----------------------------------|------------------------------------------------|----------------------------------------------|---------------------------------|-------------------------------|
| <i>Li<sup>+</sup></i>             | 51.39                                          | 51.92                                        | 98.97                           | 0.68                          |
| <i>Na<sup>+</sup></i>             | 60.94                                          | 62.08                                        | 98.16                           | 0.72                          |
| <i>K<sup>+</sup></i>              | 64.37                                          | 68.01                                        | 94.64                           | 0.88                          |
| <i>NH<sub>4</sub><sup>+</sup></i> | 50.74                                          | 53.90                                        | 94.14                           | 0.56                          |
| <i>Mg<sup>2+</sup></i>            | 54.39                                          | 56.38                                        | 96.47                           | 0.59                          |
| <i>Al<sup>3+</sup></i>            | 32.16                                          | 34.03                                        | 94.50                           | 0.80                          |

**Table. S2** The summary of calculated b-values of KMS electrode in varies electrolytes.

| <i>Ion type</i>       | <i>K<sup>+</sup></i> | <i>Na<sup>+</sup></i> | <i>Li<sup>+</sup></i> | <i>NH<sub>4</sub><sup>+</sup></i> | <i>Mg<sup>2+</sup></i> | <i>Al<sup>3+</sup></i> |
|-----------------------|----------------------|-----------------------|-----------------------|-----------------------------------|------------------------|------------------------|
| <i>Anodic peak1</i>   | 0.67                 | 0.74                  | 0.71                  | 0.57                              | 0.77                   | 0.75                   |
| <i>Cathodic peak2</i> | 0.59                 | 0.54                  | 0.56                  | 0.56                              | 0.59                   | 0.53                   |

**Table. S3** Physical and thermodynamic characteristics of selected cations.

| <i>Ion type</i>                                   | <i>K<sup>+</sup></i> | <i>Na<sup>+</sup></i> | <i>Li<sup>+</sup></i> | <i>NH<sub>4</sub><sup>+</sup></i> | <i>Mg<sup>2+</sup></i> | <i>Al<sup>3+</sup></i> |
|---------------------------------------------------|----------------------|-----------------------|-----------------------|-----------------------------------|------------------------|------------------------|
| <i>Ionic radius(nm)</i>                           | 0.152                | 0.102                 | 0.078                 | 0.148                             | 0.066                  | 0.053                  |
| <i>Hydrated radius (nm)</i>                       | 0.331                | 0.358                 | 0.382                 | 0.331                             | 0.428                  | 0.48                   |
| <i>Hydrated free energy (KJ mol<sup>-1</sup>)</i> | -343                 | -405                  | -544                  | -                                 | -1922                  | -4665                  |
